# Supplementary material for: Distinguishing between Isobaric Ions Using Microdroplet Hydrogen–Deuterium Exchange Mass Spectrometry
Source: MDPI journal article supplement (doi:10.3390/metabo11110728), 2021-10-23
Supplement: s1 [file s1]

## **SUPPORTING INFORMATION**

### **Distinguishing Between Isobaric Ions Using Microdroplet Hydrogen-Deuterium Exchange Mass Spectrometry**

Xiaowei Song<sup>1,2</sup>, Jia Li<sup>2</sup>, Mohammad Mofidfar<sup>1</sup>, Richard N. Zare<sup>1\*</sup>

1. Department of Chemistry, Stanford University, Stanford, CA, USA. 94305
2. Department of Chemistry, Fudan University, Shanghai, China. 200438

#### **Correspondence**

Richard N. Zare: rnz@stanford.edu

#### **Table of Contents**

| <b>Figure/Table</b> | <b>Legend</b>                                                                                                           | <b>Pages</b> |
|---------------------|-------------------------------------------------------------------------------------------------------------------------|--------------|
| Figure S1           | CID-MS/MS spectra of codeine, and hydrocodone.                                                                          | S2           |
| Figure S2           | CID-MS/MS spectra of 6-acetyl morphine, and naloxona.                                                                   | S3           |
| Figure S3           | CID-MS/MS spectra of morphine, and norcodeine.                                                                          | S4           |
| Table S1            | List of isobaric ions that were frequently detected in saliva or serum and successfully distinguished by HDX-CPSI-MS.   | S5           |
| Table S2            | List of isobaric ions that were frequently detected in biological fluids and successfully distinguished by HDX-CPSI-MS. | S6           |

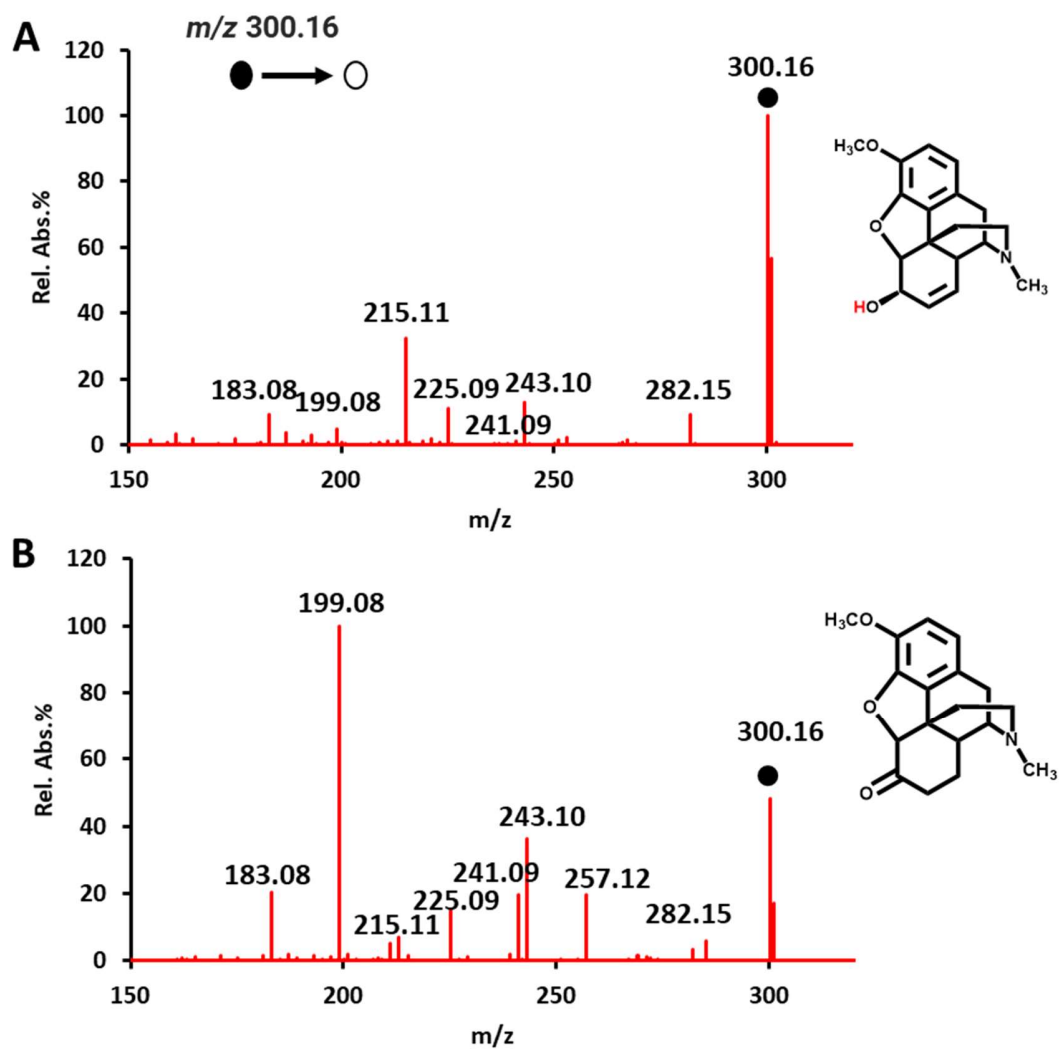

Figure S1. CID-MS/MS spectra of (A) codeine and (B) hydrocodone. The black dot indicates the precursor ion.

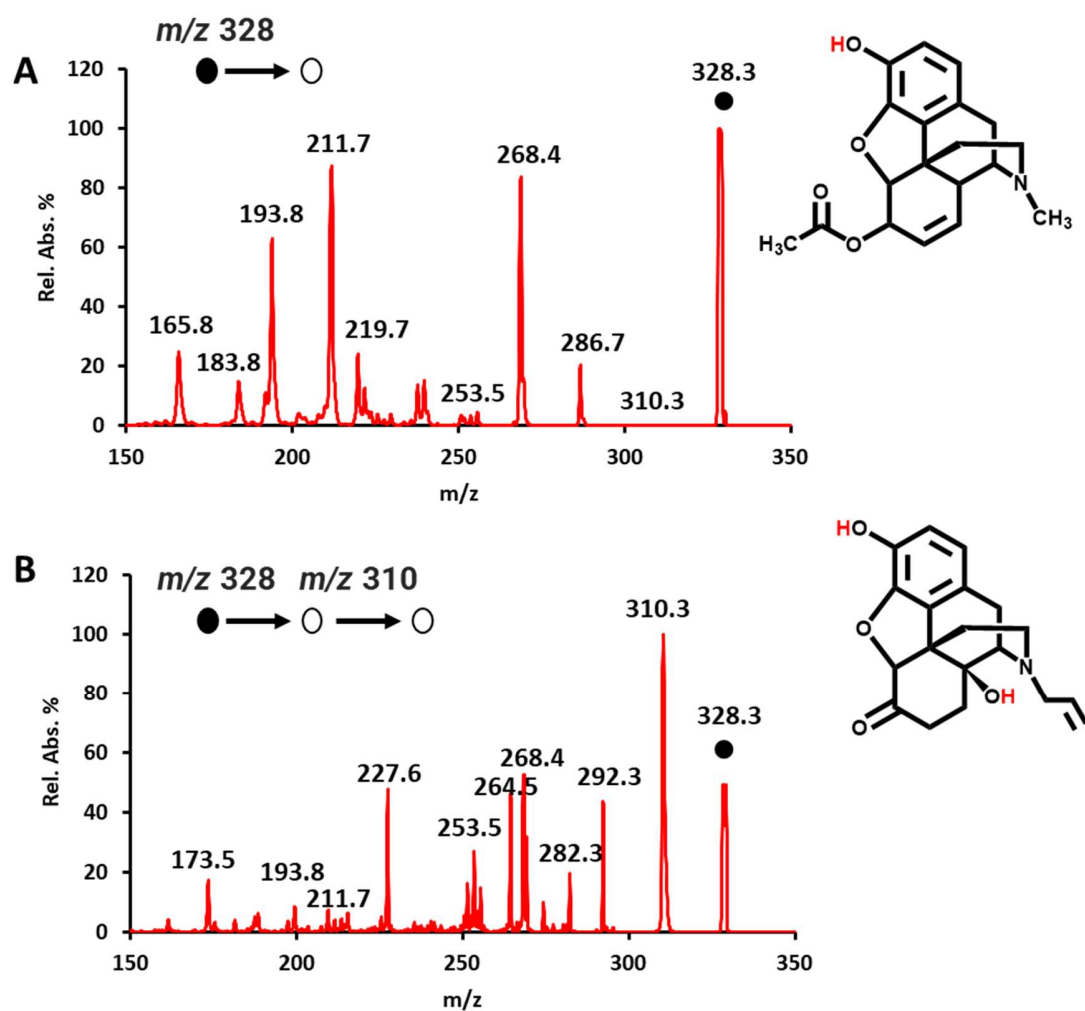

Figure S2. CID-MS/MS spectra for (A) 6-acetyl morphine and CID-MS3 experiment for (B) naloxone. The black dot indicates the precursor ion.

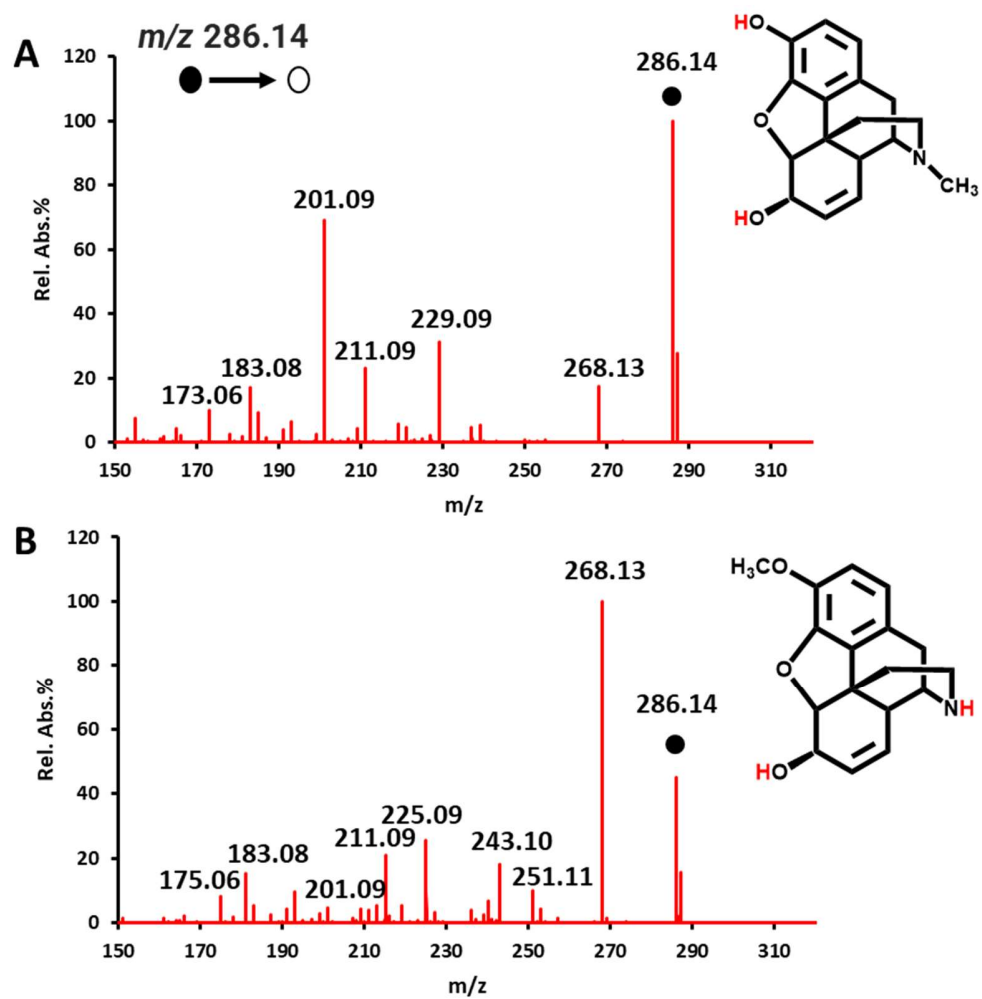

Figure S3. CID-MS/MS spectra of (A) morphine and (B) norcodeine. The black dot indicates the precursor ion.

**Table S1. Isobaric ions that were frequently detected in saliva or serum and successfully distinguished by HDX-CPSI-MS.**

| No | Exact $m/z$ | Adduct Ions | Formulae             | Metabolites           | Number of Exchangeable proton sites | Base peaks |
|----|-------------|-------------|----------------------|-----------------------|-------------------------------------|------------|
| 1  | 118.0862    | $[M+H]^+$   | $C_5H_{11}NO_2$      | Betaine               | 1                                   | $D_0$      |
|    |             |             |                      | 5-Aminopentanoic acid | 3                                   | $D_1$      |
|    |             |             |                      | Valine                | 3                                   | $D_0$      |
| 2  | 141.0789    | $[M+K]^+$   | $C_5H_{14}N_2$       | Cadaverine            | 4                                   | $D_2$      |
|    |             |             |                      | N-methyl putrescine   | 3                                   | $D_2$      |
| 3  | 146.0459    | $[M-H]^-$   | $C_5H_9NO_4$         | Glutamate             | 3                                   | $D_2$      |
|    |             |             |                      | O-acetyl serine       | 2                                   | $D_0$      |
|    |             |             |                      | N-acetyl serine       | 2                                   | $D_1$      |
| 4  | 280.0904    | $[M+Na]^+$  | $C_{10}H_{15}N_3O_5$ | 5-Methylcytidine      | 5                                   | $D_2$      |
|    |             |             |                      | 3-methylcytidine      | 4                                   | $D_2$      |
|    | 280.0920    | $[M+H]^+$   | $C_8H_{20}NO_6P$     | glycerophosphocholine | 3                                   | $D_2$      |
| 5  | 112.0369    | $[M+Na]^+$  | $C_3H_7NO_2$         | Alanine               | 3                                   | $D_1$      |
|    |             |             |                      | Sarcosine             | 2                                   | $D_1$      |
| 6  | 126.0520    | $[M+Na]^+$  | $C_4H_9NO_2$         | aminobutyric acid     | 3                                   | $D_1$      |
|    |             |             |                      | N, N-dimethylglycine  | 1                                   | $D_0$      |
| 7  | 137.0706    | $[M+H]^+$   | $C_7H_8N_2O$         | 2-aminobenzamide      | 4                                   | $D_1$      |
|    |             |             |                      | N-methylnicotinamide  | 1                                   | $D_0$      |

**Table S2. The relative intensities in HDX patterns acquired from samples of glucose (G) and inositol (I) at different molar ratios.**

| <i>m/z</i> | G:I Simulated HDX Patterns |     |     | G:I Observed HDX Patterns |     |     |
|------------|----------------------------|-----|-----|---------------------------|-----|-----|
|            | 1:1                        | 3:1 | 1:3 | 1:1                       | 3:1 | 1:3 |
| 203.05     | 46                         | 55  | 33  | 41                        | 55  | 38  |
| 204.06     | 73                         | 82  | 57  | 72                        | 78  | 63  |
| 205.07     | 100                        | 100 | 91  | 100                       | 100 | 95  |
| 206.08     | 95                         | 83  | 100 | 87                        | 91  | 100 |
| 207.09     | 64                         | 49  | 74  | 52                        | 51  | 79  |
| 208.10     | 28                         | 19  | 35  | 17                        | 18  | 40  |
| 209.11     | 4                          | 2   | 6   | 5                         | 6   | 7   |
